# Supplementary material
Source: PubMed Central journal article supplement (PMC7695070)

**Supplemental Figure 1. Individual-level agreement of 3 methods of trachoma grading.** A Venn Diagram illustrates the overlap of in-person field grades (grey), SLR photography (blue), and smartphone photography (red). Grades for trachomatous inflammation—follicular (TF) are shown in the upper panel and grades for trachomatous inflammation—intense (TI) in the lower panel. The area in white depicts eyes graded negative by all 3 methods.

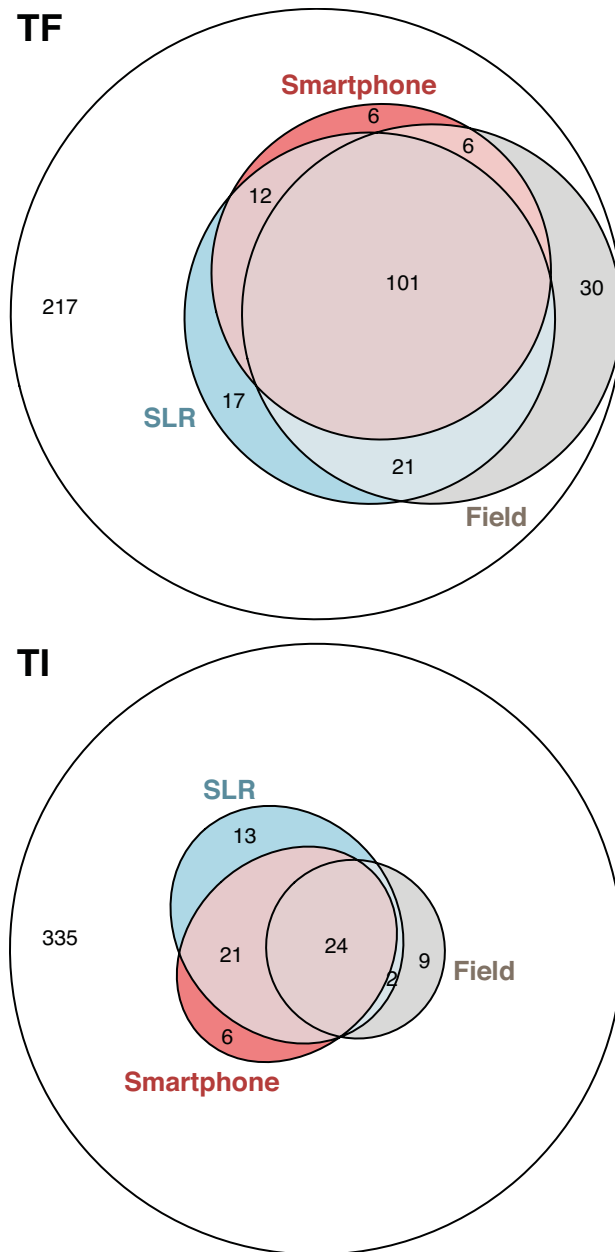

Supplement: tpmd200386.SD1.pdf [file tpmd200386.SD1.pdf]
